# Supplementary material for: Music and arithmetic interventions in preschool learning - Different routes, same results?
Source: Research Square preprint supplement (doi:10.21203/rs.3.rs-7550626/v1), 2025-10-29
Supplement: Supplementary file 1 [file 1d39f2f4cc96b1225b4014a9.xlsx]

## Sheet: anonymized minimal data set
ID	age	age_M	age_y	Gender	Group	CFT_Score	CFT_TValue	ZAREKI-K_O_T1	ZAREKI-K_O_T2	CB_T1	MX_T1	CB_T2	MX_T2	PMMA_O_T1	PMMA_O_T2	PMMA_R_T1	PMMA_R_T2	PMMA_T_T1	PMMA_T_T2	DummyV_CG	DummyV_MA	DummyV_MU
1	5;6	66	5.5	1	1	15	42	2	3	1.5	1.25	1.5	1.75	8	14	5	6	3	8	1	0	0
2	5;6	66	5.5	0	1	24	49	6	6	1.25	2	2	2.25	8	8	3	4	5	4	1	0	0
3	5;6	66	5.5	0	1	27	55	5	6	3.5	2.5	2	2.25	13	14	5	4	8	10	1	0	0
4	5;6	66	5.5	0	1	20	44	2	3	1.5	1.75	1.25	1.5	7	10	5	5	2	5	1	0	0
5	5;0	60	5	0	1	12	36	1	0	1.75	1.25	2.5	2.75	8	10	4	4	4	6	1	0	0
6	5;8	68	5.66667	0	1	27	55	15	15	2.75	2	2.25	2	11	11	5	4	6	7	1	0	0
7	5;1	61	5.08333	0	1	26	56	7	3	2	2.5	3.75	4.75	14	10	6	5	8	5	1	0	0
8	5,8	68	5.66667	0	1	18	47	7	2	2.25	2.25	1.5	2	9	14	4	5	5	9	1	0	0
9	5,7	67	5.58333	1	1	28	50	13	16	3.25	2.25	2.25	2.5	17	19	7	9	10	10	1	0	0
10	5;5	65	5.41667	1	1	28	62	16	17	3	2.75	2.75	3	11	12	6	4	5	8	1	0	0
11	5;8	68	5.66667	1	1	47	69	16	17	2.25	3	2.25	4.75	15	16	5	6	10	10	1	0	0
12	5;10	70	5.83333	1	1	16		8	13	1.25	2	2	2	10	12	5	5	5	7	1	0	0
13	5;10	70	5.83333	0	1	24		15	16	2.5	3.5	3.75	4.25	14	14	6	5	8	9	1	0	0
14	5;5	65	5.41667	0	1	38		18	16	3.25	2.5	2.75	4	14	14	6	6	8	8	1	0	0
15	6;5	77	6.41667	0	1	33		17	17	2.5	1.75	2.25	2.25	13	11	5	4	8	7	1	0	0
16	5;10	70	5.83333	0	1	40		15	18	1.5	2.25	1.25	1.75	17	14	8	6	9	8	1	0	0
17	5;3	63	5.25	0	2	17	40	10	17	2	2.25	1.75	2.5	7	11	3	6	4	5	0	1	0
18	5;3	63	5.25	1	2	20	49	9	12	1.5	1	1.25	1.75	2	5	1	2	1	3	0	1	0
19	5;6	66	5.5	1	2	23	38	11	15	3.25	2.5	3	5.25	6	8	3	3	3	5	0	1	0
20	5;5	65	5.41667	0	2	25	45	10	12	2.75	3	3	2.25	10	13	5	6	5	7	0	1	0
21	5;3	63	5.25	0	2	24	49	11	13	2.5	1.75	3	2.25	8	10	3	2	5	8	0	1	0
22	5;6	66	5.5	0	2	17	35	9	14	3.75	3	3.25	4	3	13	2	6	1	7	0	1	0
23	5;6	66	5.5	1	2	27	53	13	18	1.5	2	3.25	3	12	16	5	7	7	9	0	1	0
24	5;7	67	5.58333	1	2	18	44	5	10	1.75	2.75	3.25	2.5	7	7	3	4	4	3	0	1	0
25	5;7	67	5.58333	0	2	48	65	18	18	3.5	2.5	3.75	3.75	9	14	5	7	4	7	0	1	0
26	5;10	70	5.83333	1	2	29	47	9	16	3.5	1	3.75	2.75	1	7	1	2	0	5	0	1	0
27	5;0	60	5	0	2	15	38	6	10	1.25	2	1.25	2	5	10	3	5	2	5	0	1	0
28	5;10	70	5.83333	1	2	15		15	17	2.75	3.5	3.5	4.5	10	15	5	6	5	9	0	1	0
29	6;5	77	6.41667	0	2	22		13	15	3	2.5	3.5	2.75	14	9	7	4	7	5	0	1	0
30	6;3	75	6.25	1	2	40		14	16	3.25	1.75	3.25	4.25	11	10	5	4	6	6	0	1	0
31	5;8	68	5.66667	0	2	26		14	16	2.25	2.25	2.5	1.5	14	10	6	5	8	5	0	1	0
32	6;5	77	6.41667	1	2	61		17	17	3.5	4.25	3.25	3.5	18	17	9	7	9	10	0	1	0
33	5;9	69	5.75	0	2	25		9	17	3.5	4.5	4.5	5.25	11	17	5	7	6	10	0	1	0
34	5;6	66	5.5	0	2	39		12	16	4	4.25	2.75	4.5	18	15	8	7	10	8	0	1	0
35	5;10	70	5.83333	1	2	34		18	18	3.75	3.25	3.25	3.5	15	14	5	6	10	8	0	1	0
36	5;2	62	5.16667	0	3	29	56	8	10	3.25	2.25	1.5	3	9	12	4	5	5	7	0	0	1
37	5;2	62	5.16667	0	3	33	58	9	15	2	2.75	3	2.5	11	15	6	8	5	7	0	0	1
38	5;6	66	5.5	0	3	29	62	12	13	2.5	2.25	3.25	2.75	999	999	999	4	999	999	0	0	1
39	5;6	66	5.5	1	3	20	44	9	13	2.75	2	2.75	2	8	11	4	6	4	5	0	0	1
40	5;0	60	5	0	3	37	62	16	17	2.75	2.5	3	2.5	14	16	5	7	9	9	0	0	1
41	5;0	60	5	1	3	42	58	12	17	3.75	3.5	3	2.25	15	17	6	7	9	10	0	0	1
42	5;0	60	5	1	3	17	45	11	11	1	2.25	1.5	2.25	9	10	5	5	4	5	0	0	1
43	5;8	68	5.66667	0	3	24	49	15	18	3.25	3.25	4.25	1.75	15	17	6	7	9	10	0	0	1
44	5;8	68	5.66667	1	3	28	47	15	16	2.5	1.75	3.5	3.25	12	16	5	7	7	9	0	0	1
45	5;8	68	5.66667	0	3	32	45	16	17	3.75	3.75	4.5	3	14	17	5	8	9	9	0	0	1
46	6;0	72	6	0	3	47		17	18	2.5	3.5	2.75	4.5	18	19	8	9	10	10	0	0	1
47	5;9	68	5.66667	1	3	19		11	17	1.5	3.25	3.5	3.25	9	13	4	6	5	7	0	0	1
48	6;5	77	6.41667	1	3	25		17	18	3.5	2.5	3.5	5.25	14	20	6	10	8	10	0	0	1
49	5;7	67	5.58333	0	3	41		12	17	3.5	2.75	4	3.5	16	17	7	7	9	10	0	0	1
50	6;5	77	6.41667	1	3	19		4	15	3	2	2.25	3.25	7	14	1	7	6	7	0	0	1
51	6;3	75	6.25	0	3	23		3	8	1.75	2.75	1.75	2.75	9	10	4	5	5	5	0	0	1
52	5;6	66	5.5	1	3	16		6	999	1	2	2	3	11	11	6	6	5	5	0	0	1
